# Supplementary material
Source: MDPI journal article supplement (https://www.mdpi.com/2673-4389/3/4/37)
Supplement: s1 [file s1]

# Supplementary material Table S1

*Table S1 Relationship between the TNF- $\alpha$ -863C/A and TNF- $\alpha$ -1031T/C mutations and the HBV genotypes in the low and a high endemic area*

| No | High endemic region |          |                    |                    |              | Low endemic region |          |                    |                    |              |
|----|---------------------|----------|--------------------|--------------------|--------------|--------------------|----------|--------------------|--------------------|--------------|
|    | Sample ID           | Status   | TNF- $\alpha$ -C/A | TNF- $\alpha$ -T/C | HBV genotype | Sample ID          | Status   | TNF- $\alpha$ -C/A | TNF- $\alpha$ -T/C | HBV genotype |
| 1  | KIT11               | WT       | CC                 | TT                 | D            | KB70               | 863C/A   | AA                 | TT                 | A1           |
| 2  | KIT15               | WT       | CC                 | TT                 | D/E          | KB71               | WT       | CC                 | TT                 | D/E          |
| 3  | KIT16               | 1031 T/C | CC                 | CC                 | A            | KB72               | WT       | CC                 | TT                 | D/E          |
| 4  | KIT17               | WT       | CC                 | TT                 | D/E          | KB73               | WT       | CC                 | TT                 | D/E          |
| 5  | KIT18               | 1031 T/C | CC                 | CC                 | A1           | KB74               | WT       | CC                 | TT                 | A            |
| 6  | KIT20               | WT       | CC                 | TT                 | D/E          | KB25               | WT       | CC                 | TT                 | A            |
| 7  | KIT21               | 863C/A   | AA                 | TT                 | D            | KB27               | WT       | CC                 | TT                 | A1           |
| 8  | KIT22               | WT       | CC                 | TT                 | D            | KB28               | WT       | CC                 | TT                 | D/E          |
| 9  | KIT23               | WT       | CC                 | TT                 | D            | KB29               | WT       | CC                 | TT                 | A1           |
| 10 | KIT30               | WT       | CC                 | TT                 | D            | KB30               | WT       | CC                 | TT                 | D/E          |
| 11 | KIT31               | WT       | CC                 | TT                 | D            | KB31               | WT       | CC                 | TT                 | D/E          |
| 12 | KIT32               | WT       | CC                 | TT                 | D            | KB32               | WT       | CC                 | TT                 | A            |
| 13 | KIT33               | WT       | CC                 | TT                 | A            | KB33               | WT       | CC                 | TT                 | A            |
| 14 | KIT34               | WT       | CC                 | TT                 | A            | KB34               | WT       | CC                 | TT                 | A1           |
| 15 | KIT35               | WT       | CC                 | TT                 | D            | KB43               | 1031 T/C | CC                 | CC                 | A            |
| 16 | KIT38               | WT       | CC                 | TT                 | D            | KB45               | WT       | CC                 | TT                 | D            |
| 17 | KIT39               | WT       | CC                 | TT                 | A            | KB46               | 1031 T/C | CC                 | CC                 | D            |
| 18 | KIT50               | WT       | CC                 | TT                 | D/E          | KB48               | WT       | CC                 | TT                 | D/E          |
| 19 | KIT51               | WT       | CC                 | TT                 | A            | KB49               | WT       | CC                 | TT                 | D            |
| 20 | KIT54               | WT       | CC                 | TT                 | D            | KB60               | WT       | CC                 | TT                 | D            |
| 21 | KIT03               | WT       | CC                 | TT                 | D4           | KB63               | WT       | CC                 | TT                 | A1           |
| 22 | KIT08               | WT       | CC                 | TT                 | A            | KB64               | WT       | CC                 | TT                 | A            |
| 23 | KIT09               | WT       | CC                 | TT                 | A            | KB65               | WT       | CC                 | TT                 | D/E          |
| 24 | KIT10               | WT       | CC                 | TT                 | D            | KB67               | WT       | CC                 | TT                 | A1           |
| 25 | KIT21               | WT       | CC                 | TT                 | A1           | KB68               | WT       | CC                 | TT                 | D/E          |
| 26 | KIT25               | WT       | CC                 | TT                 | A            | KB81               | WT       | CC                 | TT                 | A            |
| 27 | KIT70               | WT       | CC                 | TT                 | A1           | KB86               | WT       | CC                 | TT                 | A1           |
| 28 | KIT71               | WT       | CC                 | TT                 | A1           | KB87               | WT       | CC                 | TT                 | D            |
| 29 | KIT47               | WT       | CC                 | TT                 | A            | KB84               | WT       | CC                 | TT                 | A1           |
| 30 | KIT21               | WT       | CC                 | TT                 | A1           | -                  | -        | -                  | -                  | -            |
| 31 | KIT12               | WT       | CC                 | TT                 | A            | -                  | -        | -                  | -                  | -            |

Abbreviations: WT; Wild type, TNF; Tumor Necrosis Factor, HBV; Hepatitis B Virus.
